# Supplementary material for: Photoinduced ultrafast charge separation in colloidal 2-dimensional CdSe/CdS-Au hybrid nanoplatelets and corresponding application in photocatalysis
Source: Royal Society of Chemistry journal article supplement (doi:10.1039/c6nr03610d), 2016-01-01
Supplement: c6nr03610d1.pdf [file c6nr03610d1.pdf]

## Electronic supplementary information (ESI)

### Photoinduced ultrafast charge separation in colloidal 2-dimensional CdSe/CdS-Au hybrid nanoplatelets and corresponding application in photocatalysis

Himani Chauhan,<sup>a||</sup> Yogesh Kumar,<sup>a||</sup> Jayanta Dana,<sup>b</sup> Biswarup Satpati,<sup>c</sup>

Harendra N. Ghosh,<sup>b,\*</sup> Sasanka Deka<sup>a,\*</sup>

<sup>a</sup>Department of Chemistry, University of Delhi, North campus, Delhi-110007, India

<sup>b</sup>Radiation & Photochemistry Division, Bhabha Atomic Research Centre, Mumbai – 400085, India

*e-mail:* [hngghosh@barc.gov.in](mailto:hngghosh@barc.gov.in), [hngghosh2004@gmail.com](mailto:hngghosh2004@gmail.com)

<sup>c</sup>Saha Institute of Nuclear Physics, 1/AF, Bidhannagar, Kolkata 700 064, India

*e-mail:* [sdeka@chemistry.du.ac.in](mailto:sdeka@chemistry.du.ac.in)

The photocatalytic degradation efficiency or percentage dye degradation (%) is calculated as

$$\text{percentage dye degradation (\%)} = \frac{A_o - A_t}{A_o} * 100 \quad (1)$$

where  $A_o$  is the initial absorbance at adsorption-desorption equilibrium before the addition of the catalyst and  $A_t$  is the absorbance of remnant dye at definite intervals of time ' $t$ ' after the addition of the catalyst.

The apparent reaction rate constant ( $k_{app}$ ) for degradation is calculated as:

$$\ln \frac{A_o}{A_t} = k_{app} t \quad (2)$$

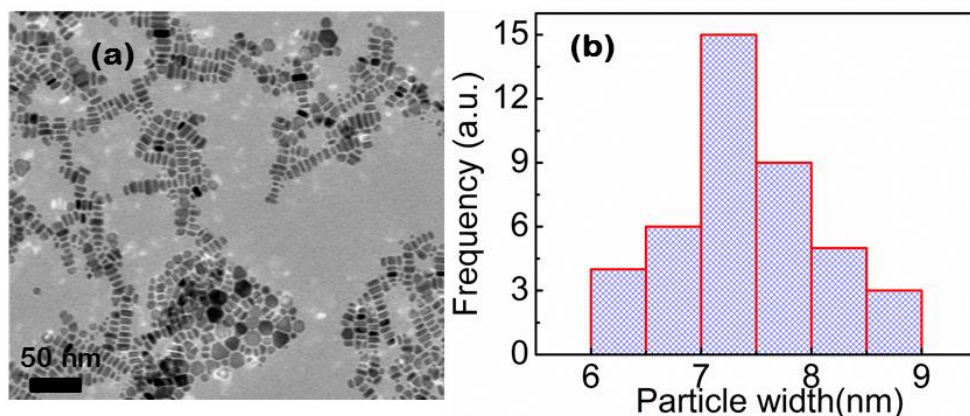

**Fig. S1** (a) Self-assembled starting seed particles lying on the edges of the sides showing the thickness, (b) particle width/thickness distribution (histogram) graph.

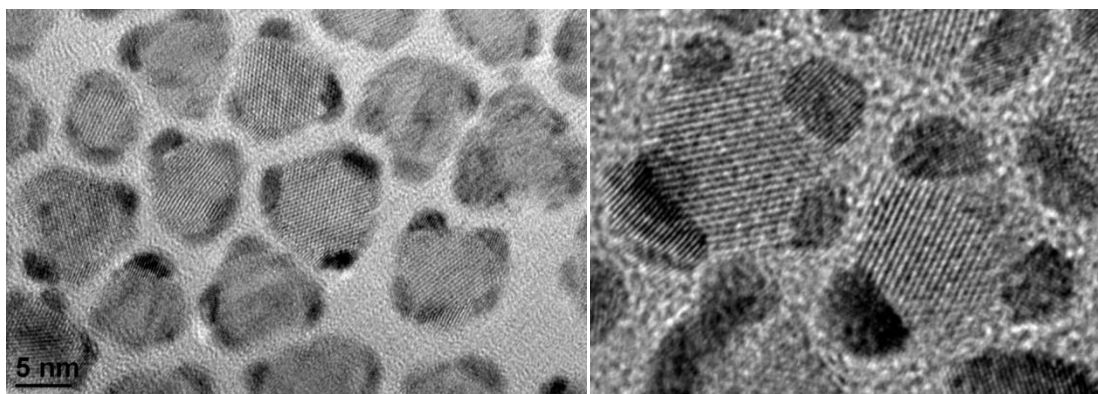

**Fig. S2** HRTEM image of few HNCs.

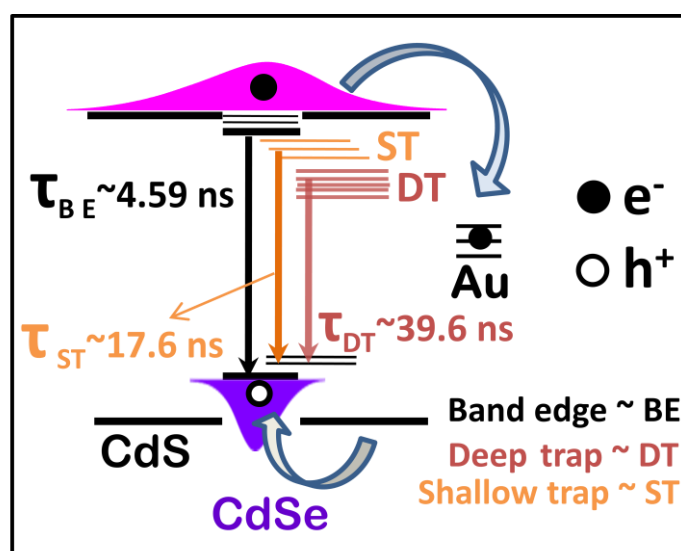

**Fig. S3** Schematic diagram of CdSe/CdS-Au heterostructure showing electron transfer to Au NPs and electron-hole recombination which are in the conduction band and the valence band respectively with different trap depth.

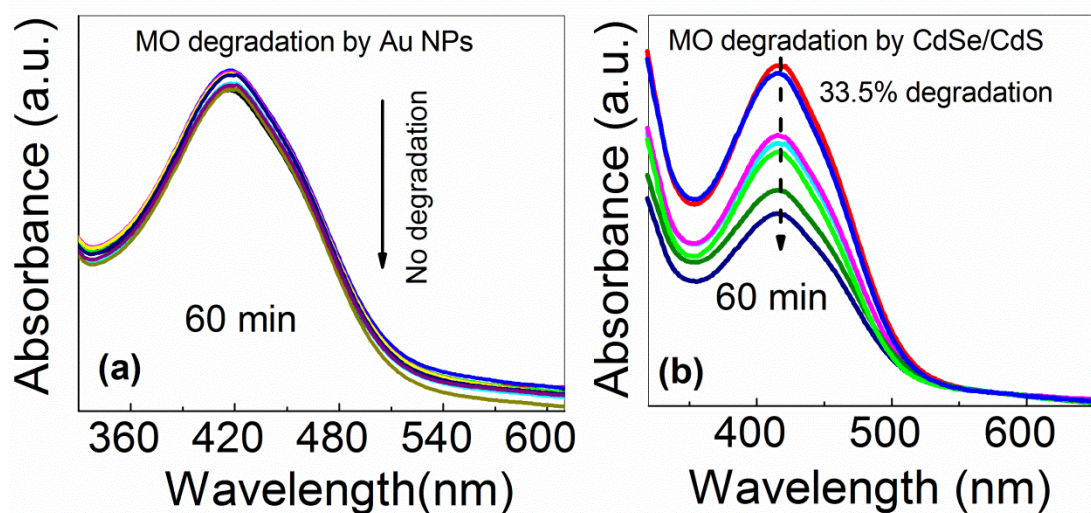

**Fig. S4** Optical absorption spectra of 10 mL 0.01 methyl orange in the presence of 7 mg of (a) Au nanoparticles and (b) 2D CdSe/CdS platelets showing the control dye degradation reactions (under sun light).

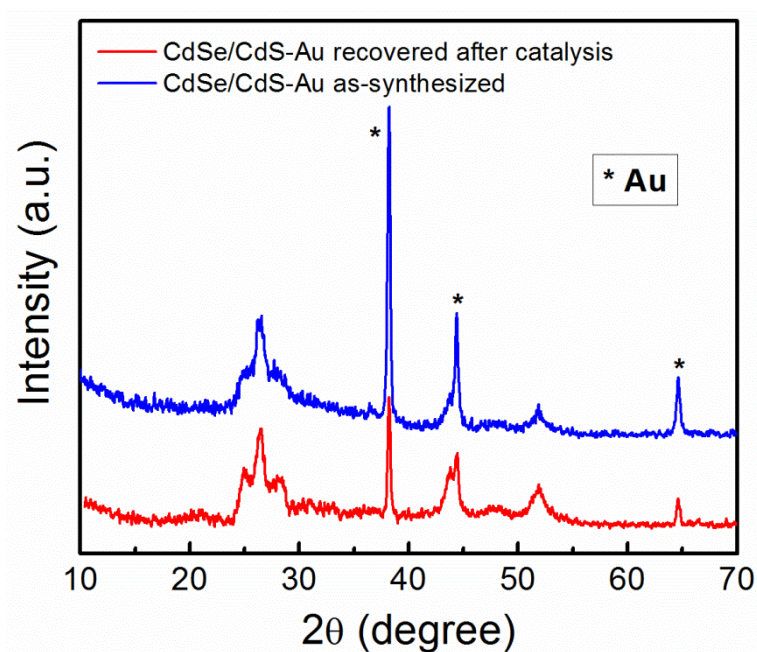

**Fig. S5** Comparison of powder XRD patterns of 2D-CdSe/CdS-Au HNCs before and after photocatalytic reactions (6 cycles).

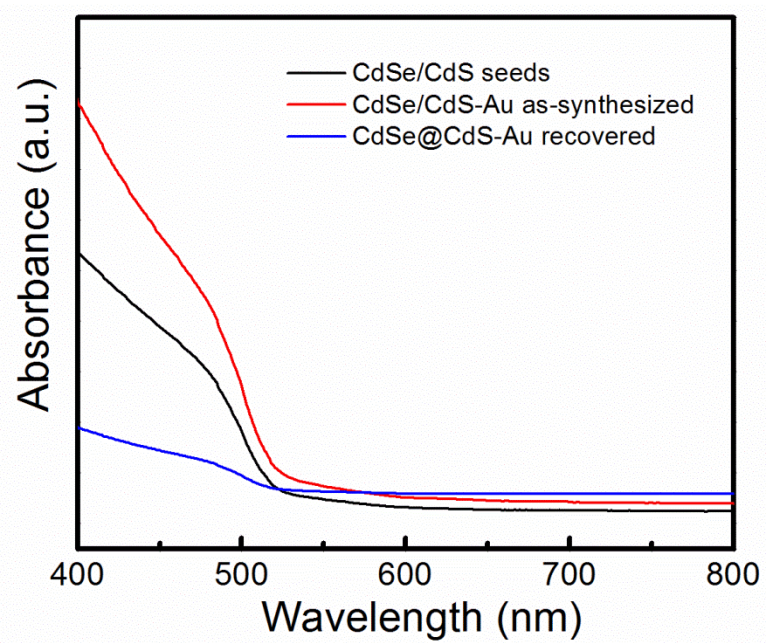

**Fig. S6** Comparison of optical absorption spectra of 2D-CdSe/CdS-Au HNCs before and after photocatalytic reactions (6 cycles) along with the optical absorption spectrum of 2D-CdSe/CdS seeds.

\*\*\*\*\*
